# Supplementary material for: A biobanking turning‐point in the use of formalin‐fixed, paraffin tumor blocks to unveil kinase signaling in melanoma
Source: PubMed Central journal article supplement (PMC8335964; doi:10.1002/ctm2.466), 2021-08-04
Supplement: CTM2-11-e466-s003.pdf [file CTM2-11-e466-s003.pdf]

**Table S1.** Clinical information of the patient cohort

| Patient    |        |                       | Collected sample |      |                       |                      | Clinical data                                               |                    |                |                       |       |
|------------|--------|-----------------------|------------------|------|-----------------------|----------------------|-------------------------------------------------------------|--------------------|----------------|-----------------------|-------|
| ID         | Gender | Age at diagnosis (ys) | FFT              | FFPE | Type                  | Location             | Primary tumor                                               |                    | Clinical stage | BRAF mutational state |       |
|            |        |                       |                  |      |                       |                      | Type                                                        | Pathological stage |                | WT                    | V600E |
| Patient_1  | f      | 61                    | y                | y    | Lymph node metastasis | Inguinal region      | SSM                                                         | pT1b               | III            | 0                     | 1     |
| Patient_2  | f      | 61                    | y                | y    | Cutaneous metastasis  | Right breast         | SSM vertical growth (not removed since of advanced disease) | pTx                | IV             | 0                     | 1     |
| Patient_3  | f      | 60                    | y                | y    | Lymph node metastasis | Axillary region      | Melanoma with complete regression                           | pTx                | III            | 0                     | 1     |
| Patient_4  | m      | 65                    | y                | y    | Primary tumor         | Lower limb           | Malignant blue naevus                                       | pT4a               | III            | 0                     | 1     |
| Patient_5  | f      | 81                    | y                | y    | Lymph node metastasis | Inguinal region      | ALM vertical growth                                         | pT3b               | III            | 1                     | 0     |
| Patient_6  | f      | 96                    | y                | y    | Primary tumor         | Head and neck region | LMM vertical growth                                         | pT4b               | II             | 1                     | 0     |
| Patient_7  | m      | 59                    | y                | y    | Lymph node metastasis | Axillary region      | SSM                                                         | pT2a               | IV             | 0                     | 1     |
| Patient_8  | m      | 70                    | y                | n    | Primary tumor         | Trunk                | SSM vertical growth (not removed since of advanced disease) | pTx                | IV             | 0                     | 1     |
| Patient_9  | m      | 54                    | y                | y    | Primary tumor         | Lower limb           | ALM vertical growth                                         | pT4b               | IV             | 1                     | 0     |
| Patient_10 | m      | 74                    | y                | y    | Primary tumor         | Trunk                | NM                                                          | pT4b               | IV             | 1                     | 0     |
| Patient_11 | m      | 55                    | n                | y    | Primary tumor         | Lower limb           | NM                                                          | pT4b               | III            | 0                     | 1     |
